# Supplementary material for: Clinical and prognostic implications of an immune‐related risk model based on TP53 status in lung adenocarcinoma
Source: J Cell Mol Med. 2021 Dec 8;26(2):436–48. doi: 10.1111/jcmm.17097 (PMC8743672; doi:10.1111/jcmm.17097)
Supplement: Supplementary file 8 — Table S4 [file JCMM-26-436-s007.xlsx]

## Sheet: Table S4-IRDEG
Supplementary Table 4 Immune- Related Differentially Expressed Genes set (IRDEG)
gene_id	baseMean	logFC	lfcSE	stat	P.Value	adj.P.Val	gene	entrez
ENSG00000180772	400.404	1.04796	0.220582	4.75087	2.03e-06	1.91e-05	AGTR2	186
ENSG00000169297	157.956	-1.25895	0.389371	-3.23329	0.00122372	0.00497754	NR0B1	190
ENSG00000172232	36.9853	1.3349	0.160377	8.32351	8.54e-17	8.04e-15	AZU1	566
ENSG00000153162	665.422	1.21953	0.145958	8.35537	6.52e-17	6.27e-15	BMP6	654
ENSG00000110680	2439.25	1.55278	0.320968	4.83779	1.31e-06	1.3e-05	CALCA	796
ENSG00000135346	58.6291	1.03871	0.33656	3.08624	0.00202704	0.00764254	CGA	1081
ENSG00000100604	58.1361	-1.65583	0.223663	-7.40325	1.33e-13	6.45e-12	CHGA	1113
ENSG00000092009	12.8157	1.14935	0.150732	7.6251	2.44e-14	1.38e-12	CMA1	1215
ENSG00000166426	79.5506	-1.25738	0.231746	-5.42568	5.77e-08	8.07e-07	CRABP1	1381
ENSG00000106113	33.1172	1.03674	0.145016	7.14917	8.73e-13	3.67e-11	CRHR2	1395
ENSG00000213218	0.496086	-1.7441	0.438526	-3.9772	6.97e-05	0.00042458	CSH2	1443
ENSG00000100448	81.2887	1.04761	0.146765	7.138	9.47e-13	3.96e-11	CTSG	1511
ENSG00000187908	10527.3	1.14816	0.185491	6.18986	6.02e-10	1.4e-08	DMBT1	1755
ENSG00000124205	15.55	1.18141	0.247716	4.76924	1.85e-06	1.77e-05	EDN3	1908
ENSG00000197561	23.4344	1.34006	0.178539	7.50571	6.11e-14	3.18e-12	ELANE	1991
ENSG00000170820	0.743776	1.12744	0.244705	4.60733	4.08e-06	3.57e-05	FSHR	2492
ENSG00000115263	4.08749	-2.344	0.417334	-5.61661	1.95e-08	3.07e-07	GCG	2641
ENSG00000215644	8.56248	-1.02981	0.187752	-5.48495	4.14e-08	6.02e-07	GCGR	2642
ENSG00000119973	3.02359	-1.07412	0.363356	-2.95611	0.00311551	0.0109663	PRLHR	2834
ENSG00000081985	61.7322	-1.16011	0.120733	-9.60887	7.34e-22	2.06e-19	IL12RB2	3595
ENSG00000123999	347.021	1.08559	0.227803	4.76548	1.88e-06	1.8e-05	INHA	3623
ENSG00000254647	0.370278	-1.78355	0.59754	-2.98482	0.00283747	0.0101324	INS	3630
ENSG00000205810	4.99643	-1.04051	0.16999	-6.12099	9.3e-10	2.06e-08	KLRC3	3823
ENSG00000096395	0.55258	-1.10446	0.282685	-3.90703	9.34e-05	0.000548557	MLN	4295
ENSG00000134640	0.769181	-1.24634	0.363336	-3.43027	0.000602987	0.00272262	MTNR1B	4544
ENSG00000215182	8226.28	2.52168	0.271728	9.28017	1.69e-20	3.62e-18	MUC5AC	4586
ENSG00000122585	10.2396	-1.28598	0.345065	-3.72678	0.000193942	0.00103298	NPY	4852
ENSG00000120937	1.31471	-1.28814	0.300454	-4.28731	1.81e-05	0.000130732	NPPB	4879
ENSG00000077264	265.413	1.73376	0.158315	10.9513	6.55e-28	6.66e-25	PAK3	5063
ENSG00000175426	535.738	1.0658	0.231214	4.60959	4.03e-06	3.54e-05	PCSK1	5122
ENSG00000125851	857.988	2.91951	0.24856	11.7457	7.43e-32	1.51e-28	PCSK2	5126
ENSG00000096088	66576.6	3.85027	0.242274	15.8922	7.18e-57	9.73e-53	PGC	5225
ENSG00000188257	247.12	1.33641	0.160351	8.33426	7.8e-17	7.39e-15	PLA2G2A	5320
ENSG00000122420	198.482	1.23486	0.150888	8.18393	2.75e-16	2.32e-14	PTGFR	5737
ENSG00000144407	26.9383	-1.39243	0.167576	-8.30923	9.63e-17	8.96e-15	PTH2R	5746
ENSG00000115386	63.649	3.38191	0.366547	9.22641	2.8e-20	5.6e-18	REG1A	5967
ENSG00000133661	13562.3	1.03914	0.162878	6.37987	1.77e-10	4.62e-09	SFTPD	6441
ENSG00000125255	20.595	2.83834	0.300913	9.43245	4.01e-21	9.93e-19	SLC10A2	6555
ENSG00000124107	19789.1	1.09067	0.141133	7.72798	1.09e-14	6.69e-13	SLPI	6590
ENSG00000157005	79.1572	-1.15329	0.416612	-2.76825	0.0056358	0.0179761	SST	6750
ENSG00000162009	4.3198	1.03899	0.295756	3.513	0.000443082	0.00209508	SSTR5	6755
ENSG00000006128	14.4436	-2.2632	0.351865	-6.432	1.26e-10	3.38e-09	TAC1	6863
ENSG00000128564	71.744	-1.57661	0.173569	-9.0835	1.05e-19	1.84e-17	VGF	7425
ENSG00000261857	24.8696	2.26868	0.192059	11.8124	3.37e-32	7.6e-29	MIA	8190
ENSG00000144852	32.2192	1.09796	0.155719	7.05094	1.78e-12	6.97e-11	NR1I2	8856
ENSG00000149305	3.07711	1.41868	0.325721	4.35549	1.33e-05	0.0001	HTR3B	9177
ENSG00000147869	1.08116	-1.66331	0.305996	-5.43572	5.46e-08	7.68e-07	CER1	9350
ENSG00000162344	35.3832	1.11414	0.29744	3.74578	0.000179836	0.000967861	FGF19	9965
ENSG00000185737	25.7773	1.06438	0.163099	6.52598	6.76e-11	1.93e-09	NRG3	10718
ENSG00000133710	1304.26	1.31616	0.169069	7.78473	6.99e-15	4.51e-13	SPINK5	11005
ENSG00000120210	6.7633	-1.8106	0.265859	-6.8104	9.73e-12	3.28e-10	INSL6	11172
ENSG00000136695	139.978	-1.38003	0.234698	-5.88004	4.1e-09	7.73e-08	IL36RN	26525
ENSG00000122136	19.4991	1.56577	0.24037	6.51403	7.32e-11	2.07e-09	OBP2A	29991
ENSG00000140279	579.332	2.01999	0.156783	12.884	5.54e-38	2.25e-34	DUOX2	50506
ENSG00000069482	97.5614	-1.16218	0.20863	-5.57055	2.54e-08	3.92e-07	GAL	51083
ENSG00000198183	11481	2.07069	0.255434	8.10655	5.21e-16	4.14e-14	BPIFA1	51297
ENSG00000137857	3006.48	1.01289	0.13779	7.35096	1.97e-13	9.26e-12	DUOX1	53905
ENSG00000169605	1.55647	2.17967	0.393012	5.54605	2.92e-08	4.44e-07	GKN1	56287
ENSG00000101448	15.5677	1.41277	0.204738	6.90037	5.19e-12	1.84e-10	EPPIN	57119
ENSG00000078898	481.741	2.18702	0.263964	8.28528	1.18e-16	1.07e-14	BPIFB2	80341
ENSG00000152034	1.55888	-1.3969	0.339176	-4.11851	3.81e-05	0.000251718	MCHR2	84539
ENSG00000136697	1.04371	-1.06828	0.268042	-3.98548	6.73e-05	0.00041184	IL1F10	84639
ENSG00000197487	0.533841	-1.00181	0.356976	-2.80639	0.00500999	0.016275	GALP	85569
ENSG00000161055	14894.8	1.50384	0.210255	7.15244	8.53e-13	3.61e-11	SCGB3A1	92304
ENSG00000125999	9232.43	1.29113	0.206551	6.25088	4.08e-10	9.88e-09	BPIFB1	92747
ENSG00000189052	7.37286	1.47644	0.333756	4.42372	9.7e-06	7.62e-05	CGB5	93659
ENSG00000104818	0.531389	-1.57187	0.508745	-3.0897	0.00200357	0.00756336	CGB2	114336
ENSG00000159527	32.966	1.3579	0.232982	5.82833	5.6e-09	1.02e-07	PGLYRP3	114771
ENSG00000167104	1.71542	1.85437	0.416143	4.45608	8.35e-06	6.68e-05	BPIFB6	128859
ENSG00000198643	278.046	1.53788	0.174057	8.83552	9.96e-19	1.46e-16	FAM3D	131177
ENSG00000186191	27.0868	1.60183	0.252469	6.34465	2.23e-10	5.68e-09	BPIFB4	149954
ENSG00000183709	1.12442	-1.27452	0.277034	-4.60059	4.21e-06	3.67e-05	IFNL2	282616
ENSG00000197110	1.05028	-1.28999	0.247074	-5.22106	1.78e-07	2.21e-06	IFNL3	282617
ENSG00000184599	5.67299	-1.21062	0.163493	-7.40474	1.31e-13	6.39e-12	TAFA3	284467
ENSG00000148386	0.595767	2.05036	0.632505	3.24166	0.00118836	0.00485652	LCN9	392399
