# Supplementary material for: Clinical and prognostic implications of an immune‐related risk model based on TP53 status in lung adenocarcinoma
Source: J Cell Mol Med. 2021 Dec 8;26(2):436–48. doi: 10.1111/jcmm.17097 (PMC8743672; doi:10.1111/jcmm.17097)
Supplement: Supplementary file 9 — Table S5 [file JCMM-26-436-s003.xlsx]

## Sheet: Table S5-correlation
Supplementary Table 5 The correlations between IRM index and immune checkpoints.
Variable_1	Variable_2	Corrrlation	P.value
IRM_index	TIM3	0.12	<0.01
IRM_index	TIGIT	0.1	<0.01
IRM_index	LAG3	0.03	<0.01
IRM_index	PDCD1	0.24	<0.01
IRM_index	CD274	0.3	<0.01
IRM_index	CTLA4	0.1	<0.01
TIM3	TIGIT	0.46	<0.01
TIM3	LAG3	0.33	<0.01
TIM3	PDCD1	0.46	<0.01
TIM3	CD274	0.64	<0.01
TIM3	CTLA4	0.46	<0.01
TIGIT	LAG3	0.63	<0.01
TIGIT	PDCD1	0.79	<0.01
TIGIT	CD274	0.42	<0.01
TIGIT	CTLA4	0.87	<0.01
LAG3	PDCD1	0.75	<0.01
LAG3	CD274	0.31	<0.01
LAG3	CTLA4	0.56	<0.01
PDCD1	CD274	0.42	<0.01
PDCD1	CTLA4	0.69	<0.01
CD274	CTLA4	0.44	<0.01
